# Supplementary material
Source: MDPI journal article supplement (https://www.mdpi.com/2225-1154/11/8/166)
Supplement: s1 [file s1]

## SUPPLEMENTARY MATERIALS

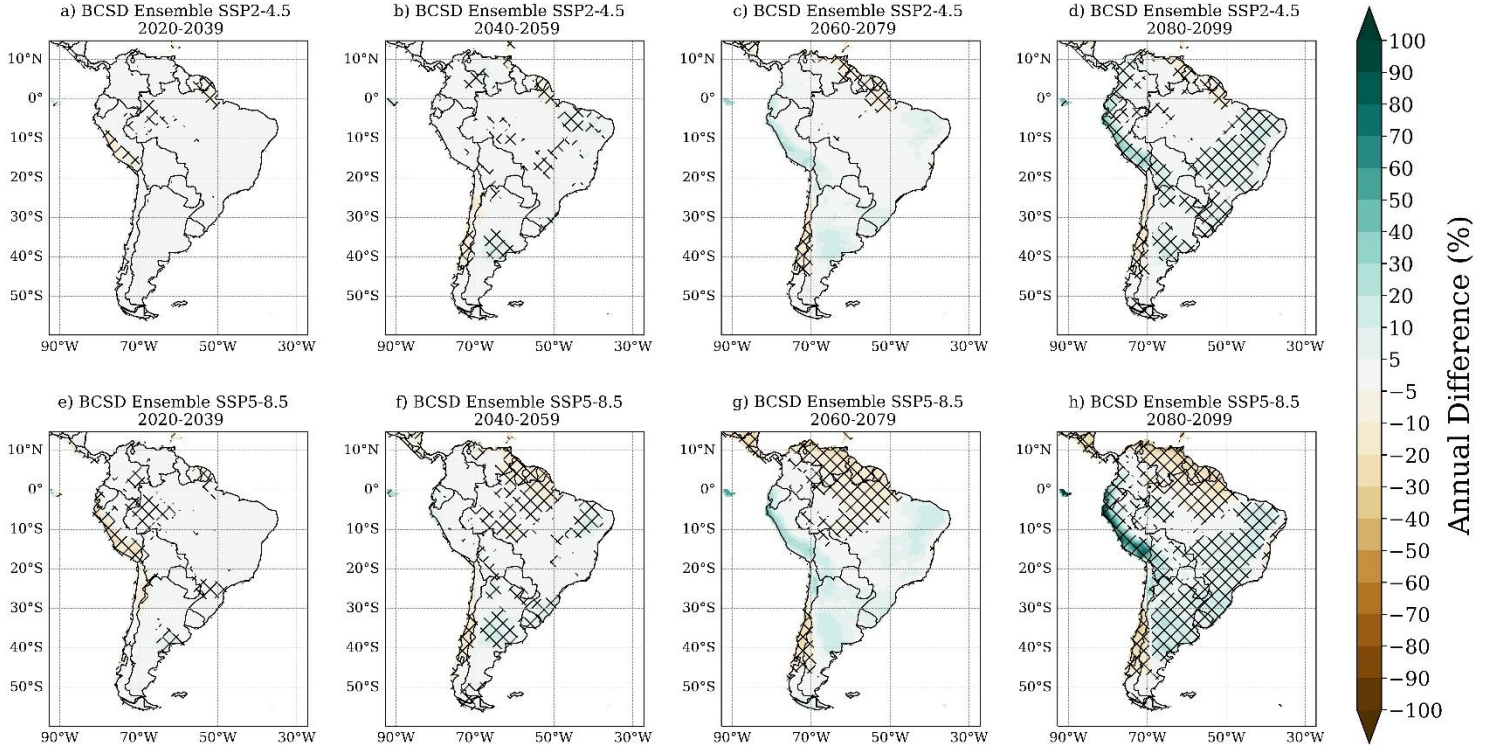

**Figure S1.** Mean annual differences of precipitation (%) between the future (2020-2039, 2040-2059, 2060-2079, 2080-2099) and historical period (1995-2014), projected by the BCSD ensemble under the SSP2-4.5 (a-d) and SSP5-8.5 (e-h) forcing scenarios. Hatched areas indicate statistical significance at a 95% confidence level.

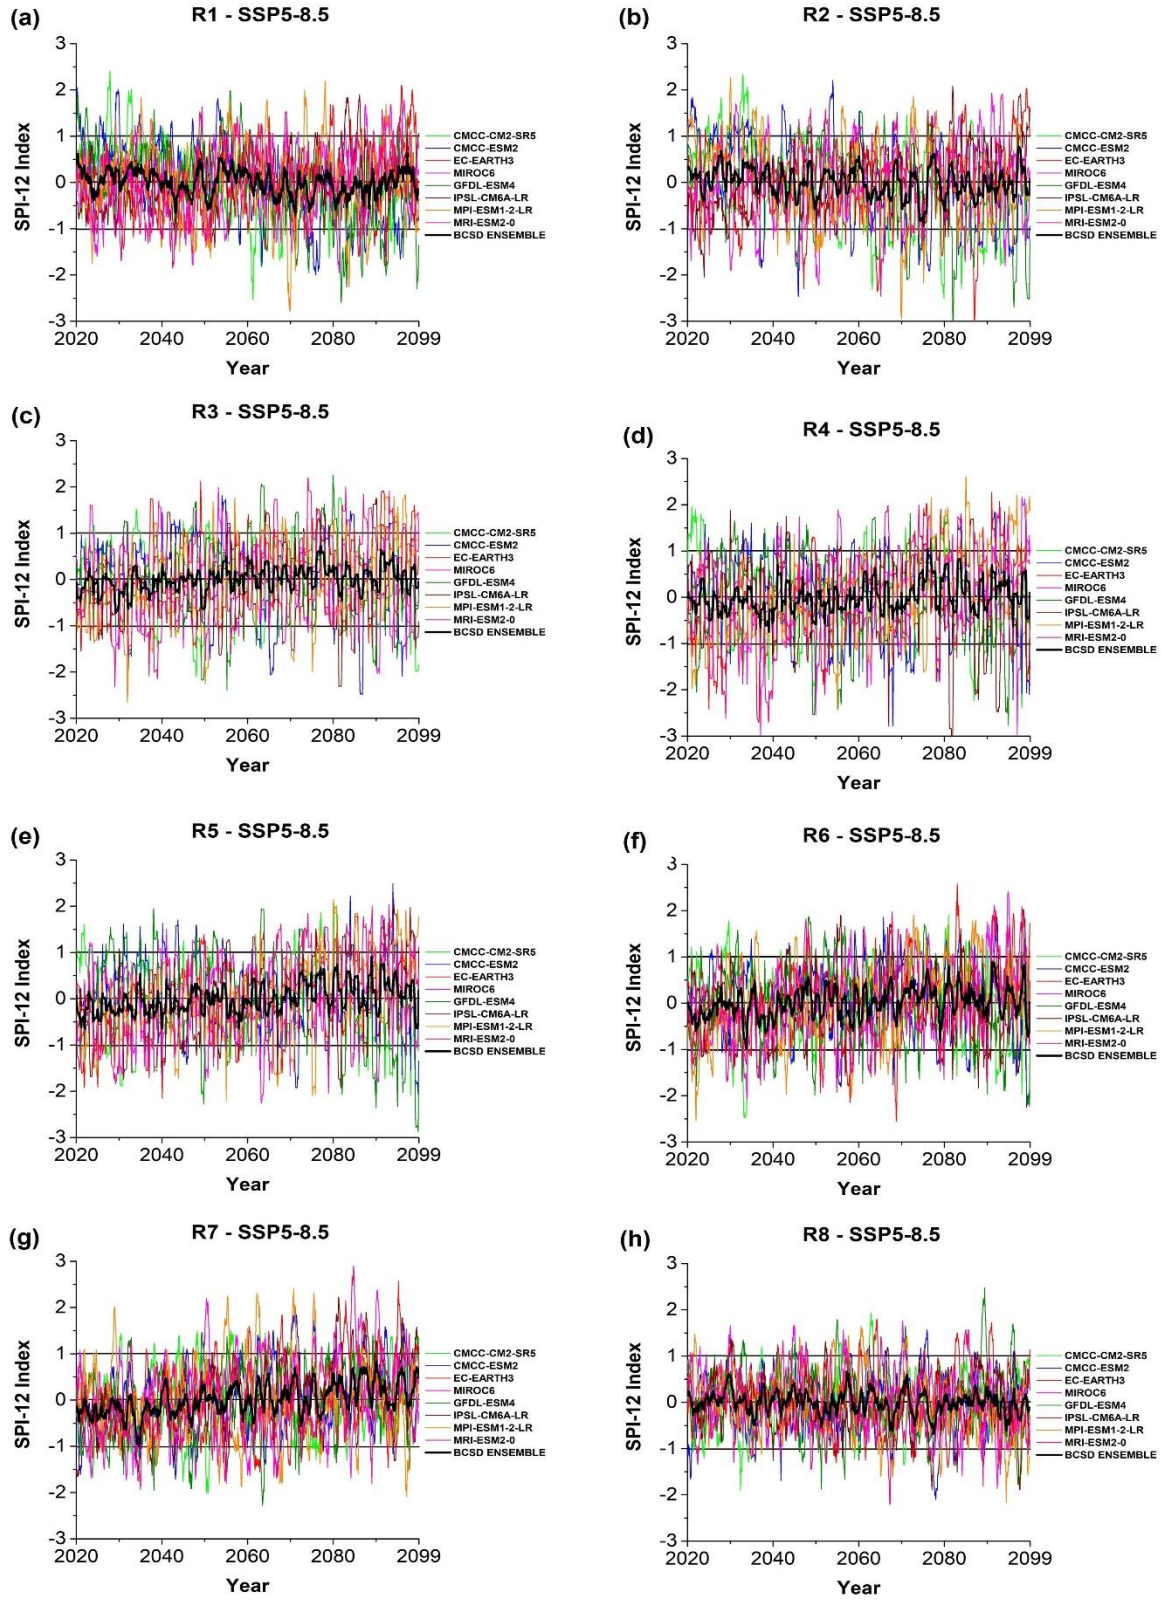

**Figure S2.** Temporal series (2020-2099) of the SPI-12 index projected by the eight CMIP6-GCMs used in the study and the BCSD ensemble (solid black line) under the SSP5-8.5 scenario for eight SA subdomains (a-h, Figure 1).

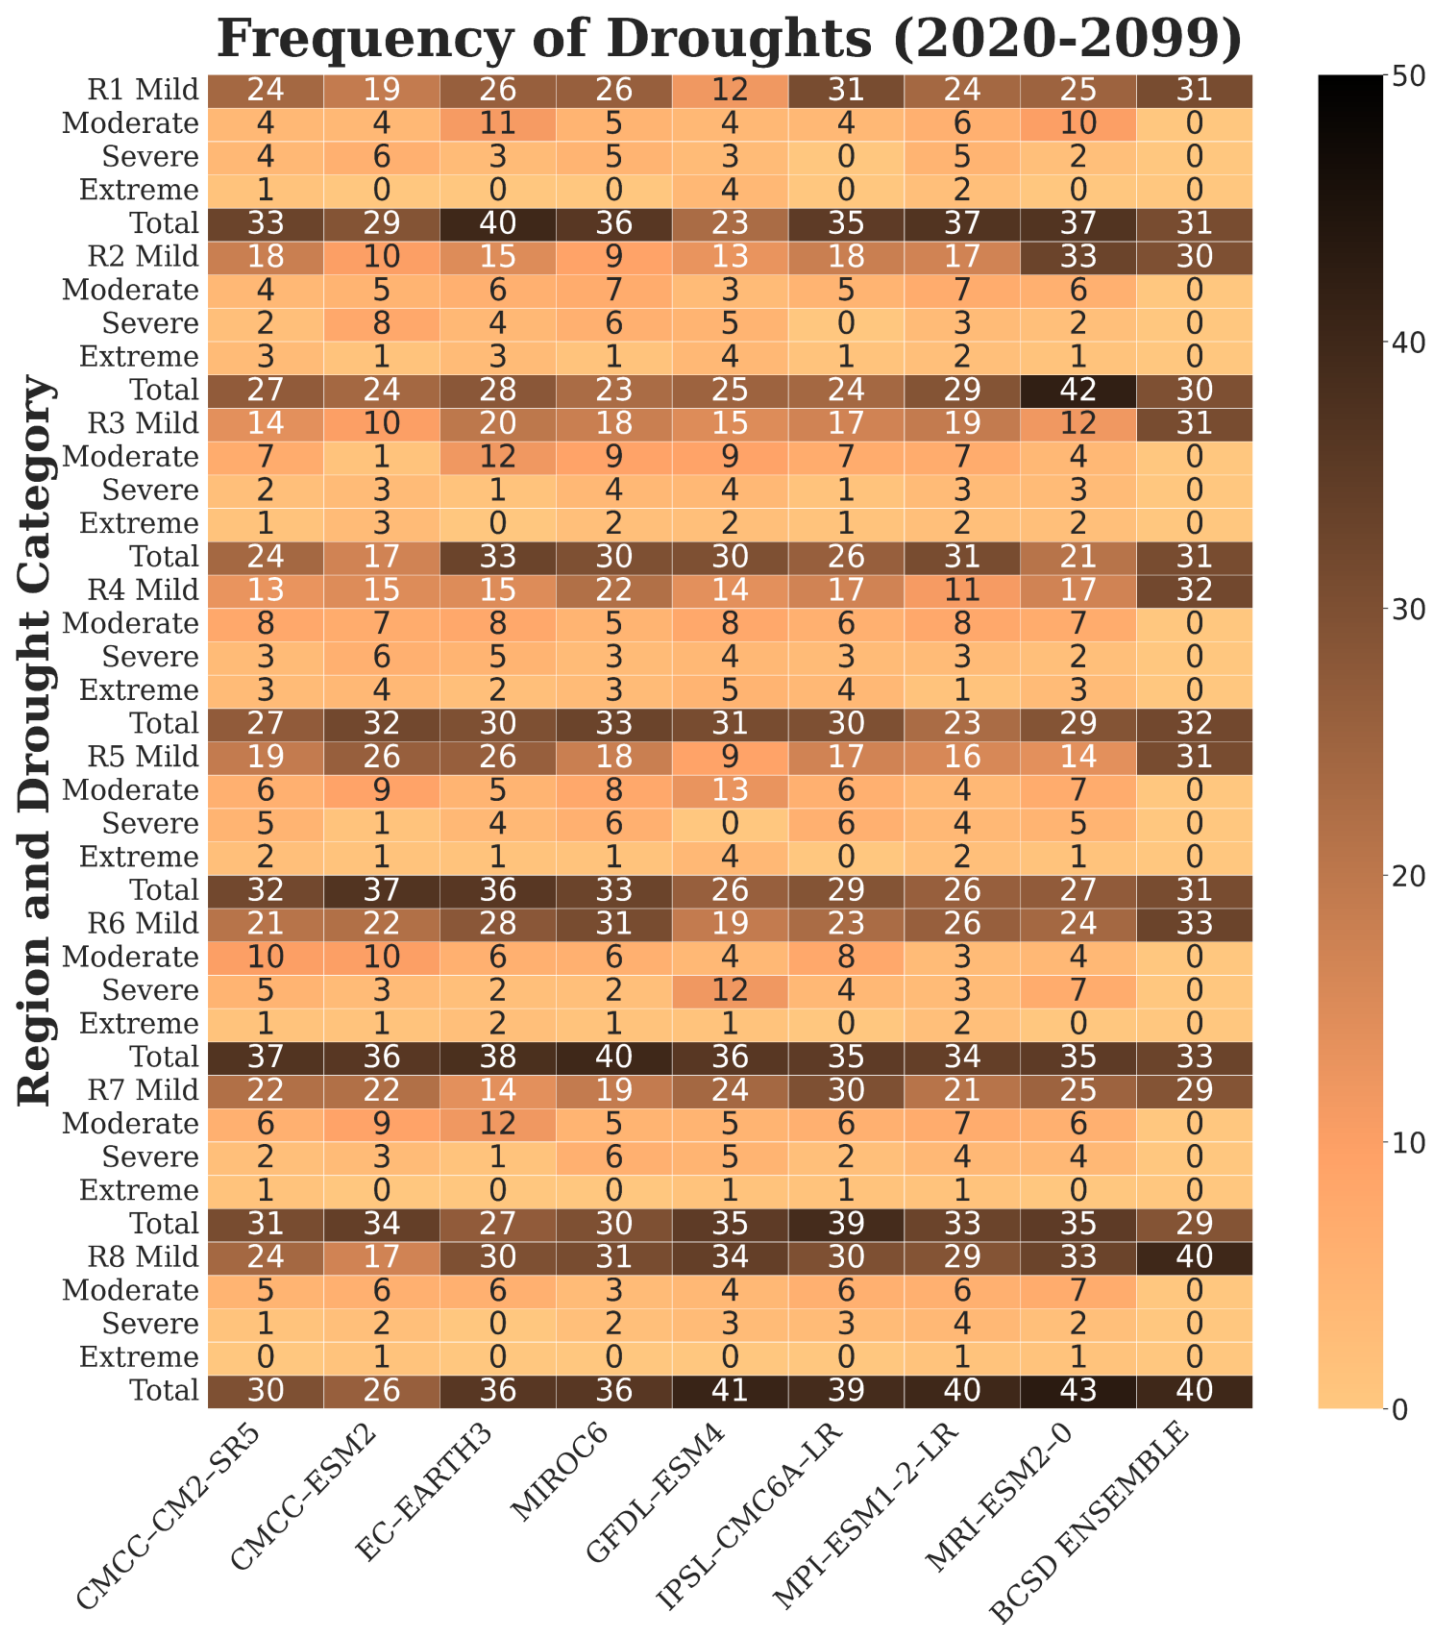

**Figure S3.** Classification of hydrological drought events identified by each CMIP-GCM used in the study and the BCSD ensemble in 2020-2099 under the SSP5-8.5 scenario for eight SA subdomains (R1-R8, Figure 1).
